# Supplementary material for: Molecular and Structural Characterization of the Tegumental 20.6-kDa Protein in Clonorchis sinensis as a Potential Druggable Target
Source: Int J Mol Sci. 2017 Mar 4;18(3):557. doi: 10.3390/ijms18030557 (PMC5372573; doi:10.3390/ijms18030557)
Supplement: Supplementary file 1 [file ijms-18-00557-s001.pdf]

# Supplementary Materials: Molecular and Structural Characterization of the Tegumental 20.6-kDa Protein in *Clonorchis sinensis* as a Potential Druggable Target

Yu-Jung Kim, Won Gi Yoo, Myoung-Ro Lee, Jung-Mi Kang, Byoung-Kuk Na, Shin-Hyeong Cho, Mi-Yeoun Park and Jung-Won Ju

**Table S1.** Predicted molecular pharmacokinetic properties of the inhibitor candidates.

|                                         | STU    |                | ANP    |                | BK3    |                | CRK    |                | DTQ    |                | MRD    |                |
|-----------------------------------------|--------|----------------|--------|----------------|--------|----------------|--------|----------------|--------|----------------|--------|----------------|
|                                         | Result | Probability(%) |
| <b>1. ADMET</b>                         |        |                |        |                |        |                |        |                |        |                |        |                |
| <b>Absorption</b>                       |        |                |        |                |        |                |        |                |        |                |        |                |
| BBB                                     | -      | 52.4           | +      | 87.6           | +      | 96.6           | +      | 69.3           | +      | 67.1           | +      | 93.4           |
| HIA                                     | +      | 97.3           | -      | 69.5           | +      | 99.8           | +      | 93.7           | +      | 93.1           | +      | 97.4           |
| Caco-2                                  | -      | 52.1           | -      | 72.0           | -      | 62.5           | -      | 55.9           | +      | 61.6           | +      | 54.5           |
| <b>Metabolism</b>                       |        |                |        |                |        |                |        |                |        |                |        |                |
| <b>CYP450 substrate</b>                 |        |                |        |                |        |                |        |                |        |                |        |                |
| 2C9                                     | NS     | 76.8           | NS     | 85.3           | NS     | 87.4           | NS     | 69.2           | NS     | 76.3           | NS     | 82.8           |
| 2D6                                     | NS     | 76.7           | NS     | 83.5           | NS     | 65.2           | NS     | 79.8           | NS     | 84.4           | NS     | 85.4           |
| 3A4                                     | S      | 79.9           | NS     | 56.0           | NS     | 65.1           | NS     | 50.0           | NS     | 57.4           | NS     | 58.2           |
| <b>CYP450 inhibitor</b>                 |        |                |        |                |        |                |        |                |        |                |        |                |
| 1A2                                     | NI     | 56.3           | NI     | 88.5           | I      | 55.7           | NI     | 71.5           | I      | 59.1           | NI     | 84.0           |
| 2C9                                     | NI     | 67.3           | NI     | 92.2           | NI     | 89.8           | NI     | 71.0           | NI     | 61.3           | NI     | 86.8           |
| 2D6                                     | NI     | 82.3           | NI     | 90.1           | NI     | 85.3           | NI     | 90.8           | NI     | 61.3           | NI     | 92.2           |
| 2C19                                    | NI     | 70.0           | NI     | 91.3           | NI     | 78.1           | NI     | 59.3           | I      | 67.9           | NI     | 74.3           |
| 3A4                                     | NI     | 56.3           | NI     | 89.6           | NI     | 89.2           | NI     | 81.9           | NI     | 54.8           | NI     | 89.7           |
| CYP Inhibitory Promiscuity              | I      | 59.0           | NI     | 97.2           | I      | 65.1           | NI     | 88.0           | I      | 73.4           | NI     | 88.9           |
| <b>Toxicity</b>                         |        |                |        |                |        |                |        |                |        |                |        |                |
| AMES toxicity                           | -      | 63.2           | -      | 78.0           | -      | 59.5           | -      | 64.3           | +      | 84.5           | -      | 86.8           |
| FISH                                    | -      | 53.7           | -      | 60.4           | +      | 95.9           | +      | 86.0           | -      | 87.9           | -      | 89.1           |
| Honey Bee                               | -      | 72.4           | -      | 68.9           | -      | 83.8           | -      | 74.9           | -      | 72.2           | +      | 78.4           |
| Carcinogens                             | -      | 85.7           | -      | 91.1           | -      | 82.8           | -      | 91.6           | -      | 94.3           | +      | 68.2           |
| Acute Oral Toxicity                     | III    | 58.0           | III    | 63.4           | III    | 72.8           | III    | 65.0           | III    | 54.5           | III    | 84.2           |
| <b>2. Lipinski Molecular Descriptor</b> |        |                |        |                |        |                |        |                |        |                |        |                |
| HBA (≤10)                               |        | 7.0            |        | 18.0           |        |                |        |                |        |                |        |                |
| HBD (≤5)                                |        | 2.0            |        | 9.0            |        |                |        |                |        |                |        |                |
| clogP (≤5)                              |        | 3.9            |        | -3.7           |        |                |        |                |        |                |        |                |
| MW (≤500)                               |        | 466.5          |        | 506.2          |        |                |        |                |        |                |        |                |
| <b>Additional Molecular Descriptor</b>  |        |                |        |                |        |                |        |                |        |                |        |                |
| n-Rot (≤10)                             |        | 2.0            |        | 8.0            |        |                |        |                |        |                |        |                |
| TPSA (≤140)                             |        | 69.5           |        | 281.9          |        |                |        |                |        |                |        |                |
| Binding Energy (kcal/mol)               |        | -7.2           |        | -11.0          |        |                |        |                |        |                |        |                |

BBB, blood-brain barrier; HIA, human intestinal absorption; + positive; - negative; I, inhibitor; NI, non-inhibitor; NS, non-substrate; HBA, number of hydrogen bond acceptors; HBD, number of hydrogen bond donors; clogP, logarithm of compound partition coefficient between n-octanol and water; MW, molecular weight; n-Rot, number of rotatable bonds; TPSA, topological polar surface area. A compound is predicted as a class III risk for acute toxicity when the LD<sub>50</sub> is greater than 500 mg/kg.

## <Inhibitor candidates>

STU: staurosporine

ANP: phosphoaminophosphonic acid-adenylate ester

BK3: 3-(naphthalen-1-ylmethyl)-1-(piperidin-4-ylmethyl)-1H-pyrazolo[3,4-d]pyrimidin-4-amine

CRK: 4-((z)-[2-[3-(methylsulfonyl)propanoyl]-5-oxo-1-(2-oxoethyl)-1,5-dihydro-4h-imidazol-4-ylidene)methyl]benzenolate

DTQ: 4-[3-hydroxyanilino]-6,7-dimethoxyquinazoline

MRD: (4r)-2-methylpentane-2,4-diol

**Table S2.** LC-MS/MS identification of rCsTegu20.6.

| Name       | Mass  | Score | Queries matched | Sequence coverage | Matched peptide                 | Start | End |
|------------|-------|-------|-----------------|-------------------|---------------------------------|-------|-----|
| CsTegu20.6 | 20565 | 489   | 149             | 56%               | NNIDPSMIKRWQVLFDAADDSGVITLDEFCK | 31    | 60  |
|            |       |       |                 |                   | WQVLFDAADDSGVITLDEFCK           | 41    | 60  |
|            |       |       |                 |                   | GPSLPREVDVITATLPLDQQVDIVNEVMR   | 82    | 110 |
|            |       |       |                 |                   | EVDVITATLPLDQQVDIVNEVMR         | 88    | 110 |
|            |       |       |                 |                   | NEPFDENLVSK                     | 114   | 124 |
|            |       |       |                 |                   | GSSWCFSFSYEPK                   | 145   | 156 |

```

1  atggagccattccttagaagccttttttagcattgacacggaccacacagaggatcact
   M E P F L E A F F S I D T D H T E R I T
61  atacgggagctgcaagactatgtgaggcgaaataatattgatccgtcaatgattaagcga
   I R E L Q D Y V R R N N I D P S M I K R
121  tggcaagttttattcgacgacgagattccggagtgattacactggatgaattttgcaag
   W Q V L F D A D D S G V I T L D E F C K
181  acgcttggaattcgccctctgaagcccggttacaacgcaaataatggttcgagctagt
   T L G I R P S E A R A Y N A N M V R A S
241  cgtggtccttcgctgccacgaggttgacgttattactgcaactctgcctttggaccaa
   R G P S L P R E V D V I T A T L P L D Q
301  caggttgatattgtcaatgaggtgatgcgactgacgcgcaatgaaccctttgatgagaat
   Q V D I V N E V M R L T R N E P F D E N
361  ctggtaagcaaaactgaagcaattttctcgaccgtcaatacggacgaatgtggcatgtg
   L V S K Q L K Q F L D R Q Y G R M W H V
421  gtgataacaaaaggatccagctggtgcagttttctcttacgagccgaagacctcacttttc
   V I T K G S S W C S F S Y E P K T S L F
481  ttccaactgcgcaaatacacctaccttgtgtggaagacaccaagc
   F Q L R K Y T Y L V W K T P S

```

**Figure S1.** Characterization of CsTegu20.6 sequence. CsTegu20.6 cDNA (528 nt) and deduced amino acid sequence (175 aa) are displayed. The shadowed fragment indicates the EF-hand calcium-binding domain (PS00018) and the underlined fragment represents the dynein light-chain domain (PF01221).

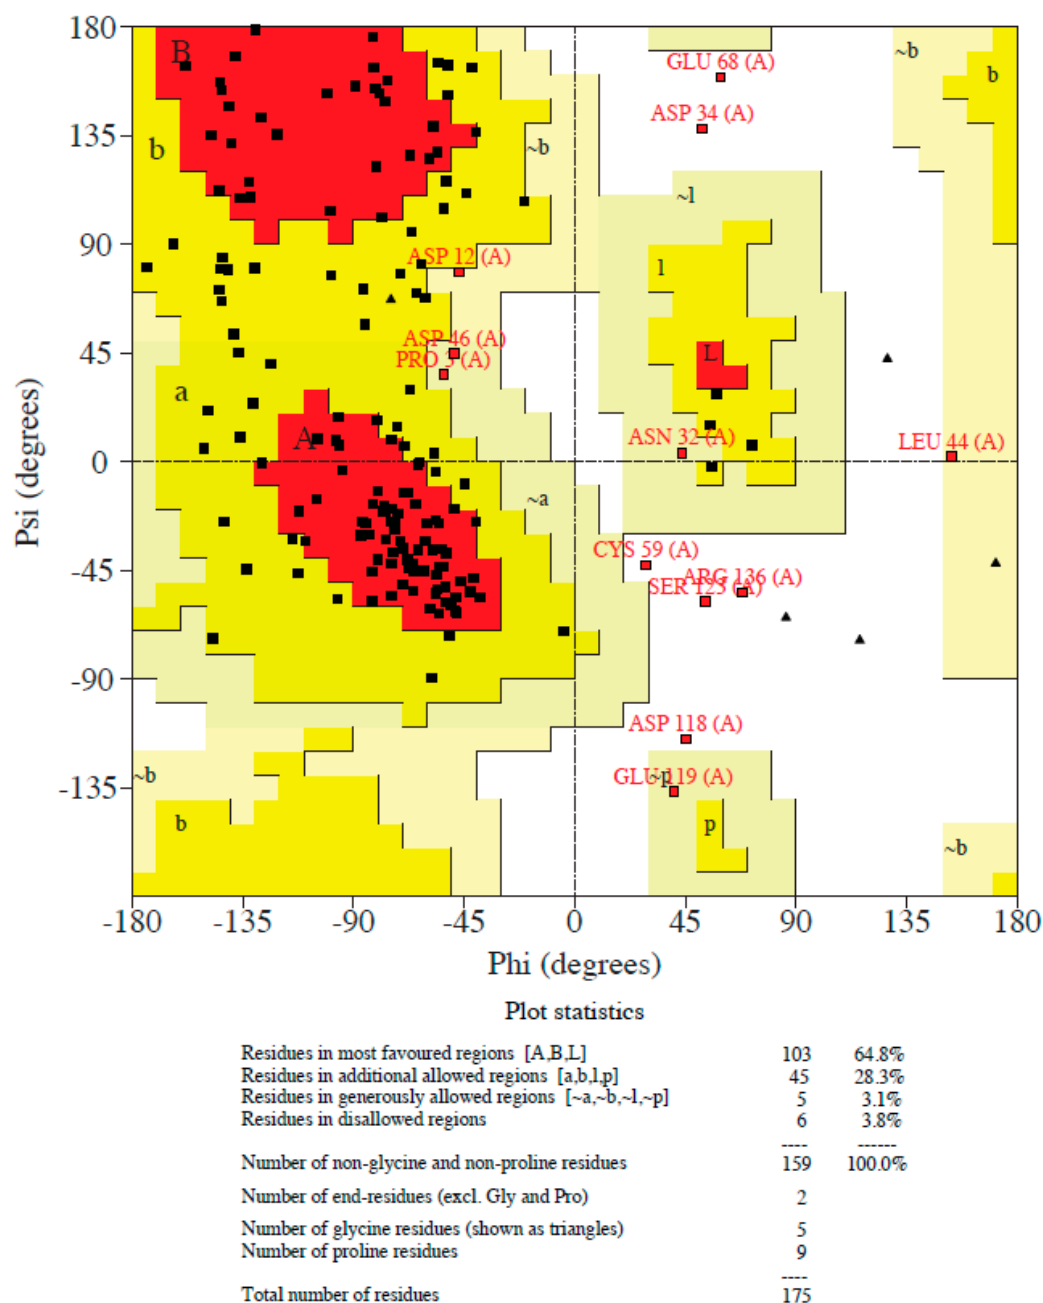

**Figure S2.** Evaluation of 3D model of CsTegu20.6 after using I-TASSER and FG-MD. Ramachandran plot showed the residues in the most favored regions (64.8%), additional allowed regions (28.3%), generously allowed regions (3.1%), and disallowed regions (3.8%). Red (A, B, L), yellow (a, b, l, p) and light yellow (~a, ~b, ~l, ~p) indicate the most favored regions, allowed regions and generously allowed regions. White shows disallowed regions. All non-glycine and non-proline residues are shown as closed black squares while glycines (non-end) are shown as closed black triangles. Disallowed residues are colored in red.

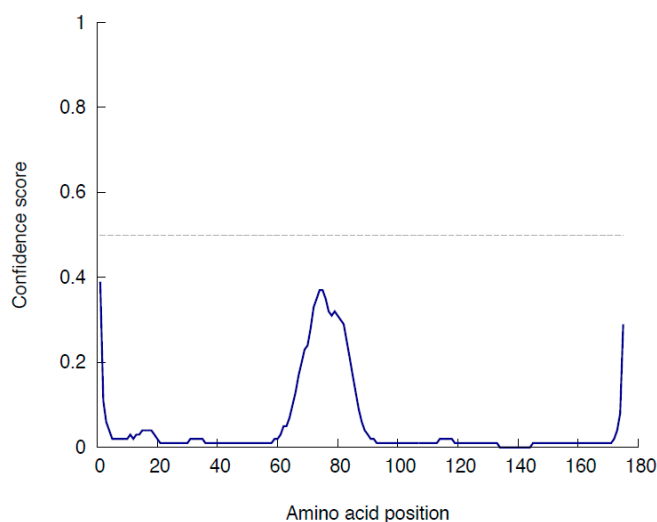

**Figure S3.** Disorder profile plot of CsTegu20.6. The plot indicates the position of each amino acid sequence against the disordered state. The disordered region is located between positions 61–90.

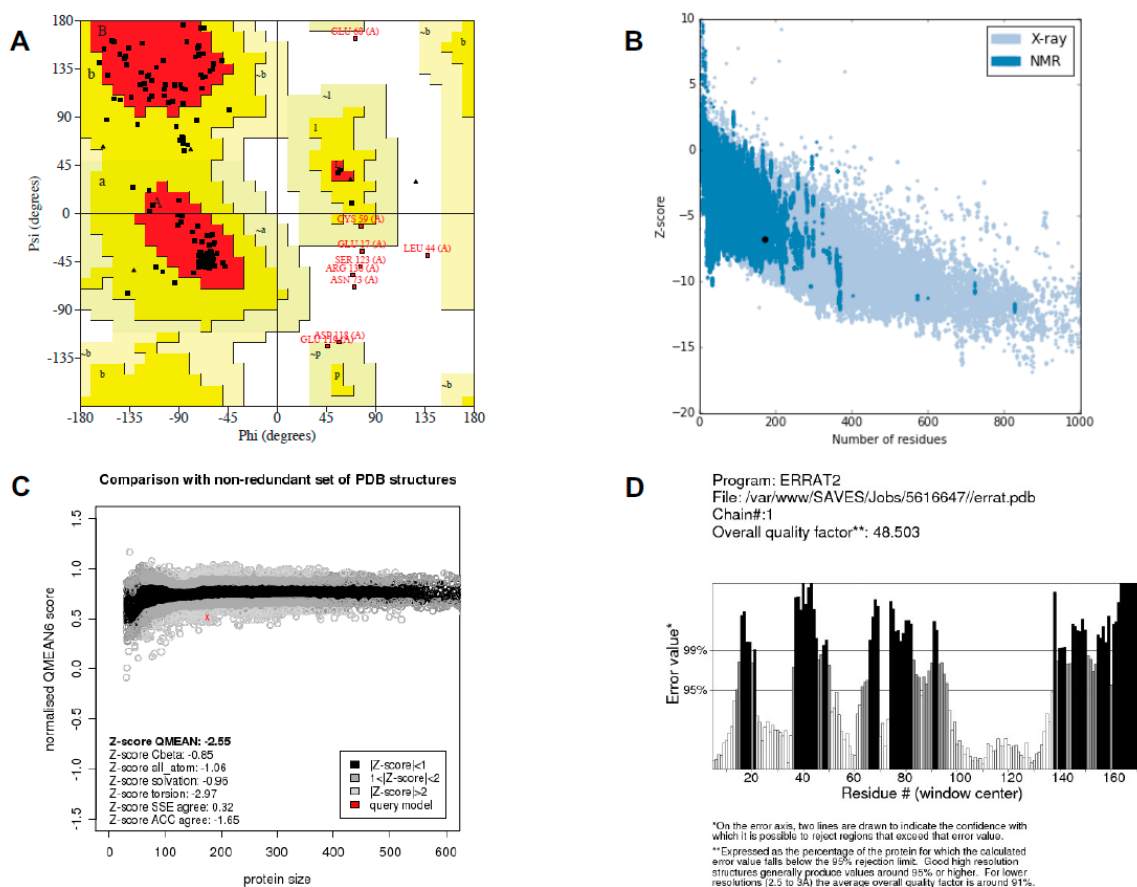

**Figure S4.** Validation of the initial 3D model of CsTegu20.6. (A) Ramachandran plot showing the residues in the most favored regions (81.8%), additional allowed regions (15.1%), generously allowed regions (0.6%), and disallowed regions (2.5%). Red (A, B, L), yellow (a, b, l, p) and light yellow ( $\sim a$ ,  $\sim b$ ,  $\sim l$ ,  $\sim p$ ) indicate the most favored regions, allowed regions and generously allowed regions. White shows disallowed regions. All non-glycine and non-proline residues are shown as closed black squares while glycines (non-end) are shown as closed black triangles. Disallowed residues are colored in red. (B) The ProSA energy profile indicates that the Z-score was  $-6.75$ . (C) The QMEAN Z-score is  $-2.55$ . (D) In the ERRAT plot, the overall quality factor is 48.50%.

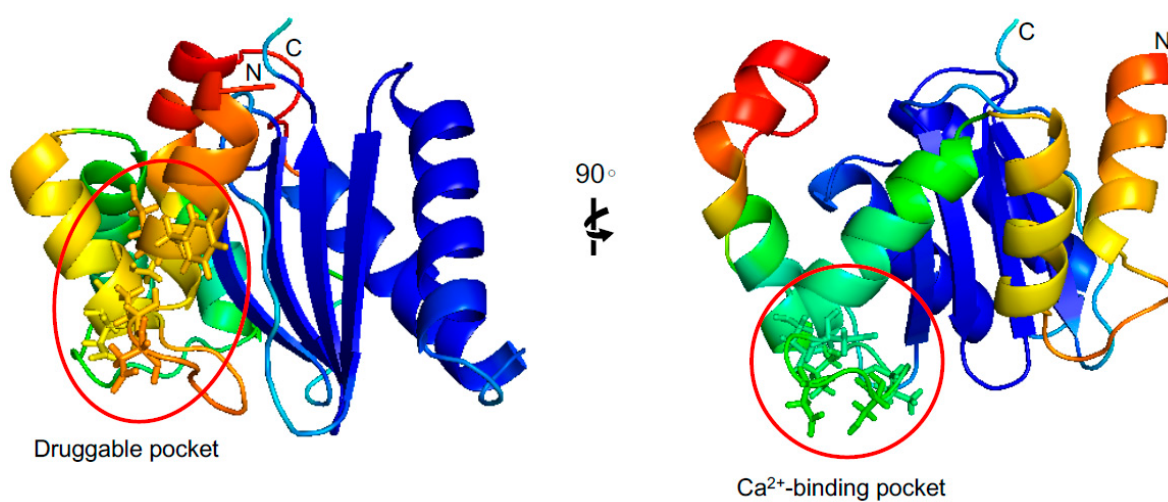

**Figure S5.** 3D view of residue error in CsTegu20.6 3D model. 3D cartoon of the model was colored by the per-residue error according to the B-factor values using ModFOLD6. Decreasing magnitudes, as B-factor values, are color coded from red to blue. The two faces of CsTegu20.6 are presented by vertical rotation of 90°. Druggable pocket (See the ‘2.8. Virtual Inhibitor Screening’ section) and Ca<sup>2+</sup>-binding pocket (See the ‘2.7. EF-hand Calcium-binding Site’ section).
